# Supplementary material for: Flexible transparent conducting composite films using a monolithically embedded AgNW electrode with robust performance stability
Source: Royal Society of Chemistry journal article supplement (doi:10.1039/c3nr05348b), 2013-11-06
Supplement: c3nr05348b.pdf [file c3nr05348b.pdf]

## Supporting Information for:

### Flexible Transparent Conducting Coimposite Film Using Monolithically Embedded AgNW Electrode with Robust Performance Stability

*By Hyeon-Gyun Im, Jungho Jin, Ji-Hoon Ko, Jaemin Lee, Jung-Yong Lee, and Byeong-Soo Bae*

#### Flexibility of AgNW-GFRHybrimer film

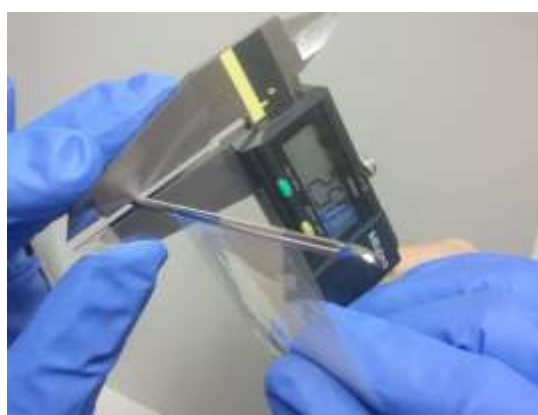

**Figure S1.** Optical image of Mandrel bending test of AgNW-GFRHybrimer film (bending radius = 2.5 mm). We confirmed that there was no degradation in the sheet resistance or film deformation such as cracks.

#### Surface topography of AgNW-GFRHybrimer film

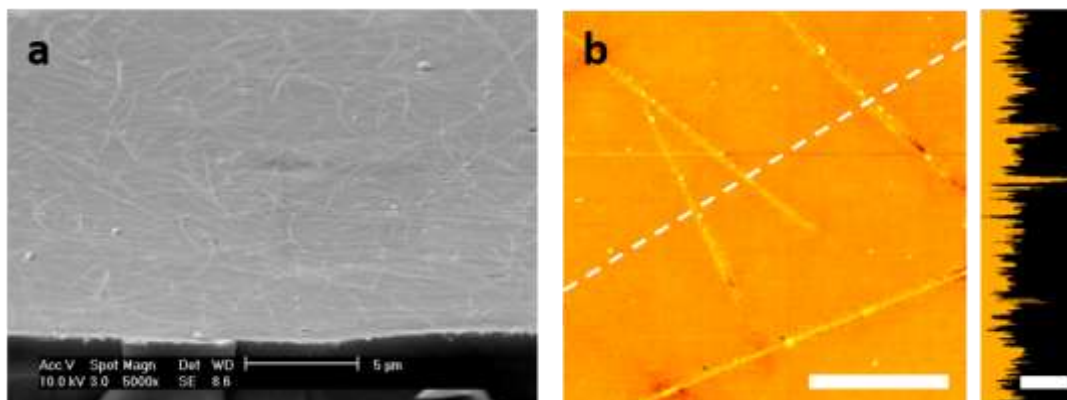

**Figure S2.** (a) Surface SEM image of AgNW-GFRHybrimer film, showing the embedded AgNW TCE on the surface. (b) AFM image of AgNW-GFRHybrimer film. The  $R_{\text{RMS}}$  and peak-to-peak values are 1 nm and 4 nm, respectively. The scale bars are 2  $\mu\text{m}$  and 2 nm, respectively.

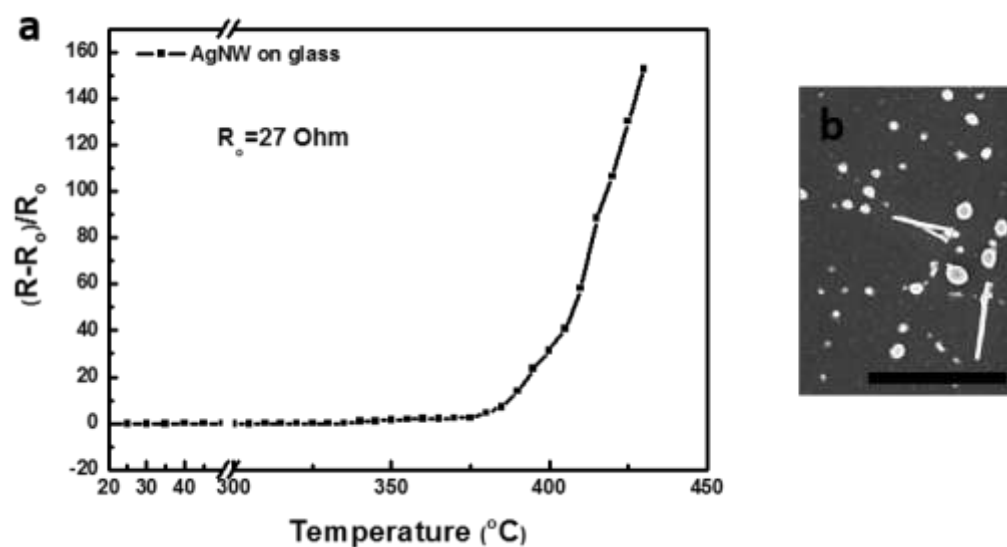

#### Thermal stability test using a “standard” AgNW TCE on glass substrate

**Figure S3.** (a) Normalized  $R_{sh}$  change values of AgNW on glass substrate vs. temperature (ramp rate =  $5 \text{ }^{\circ}\text{C min}^{-1}$ ). (b) SEM image of AgNW on glass substrate after the test. Note that the AgNW networks are melted and disconnected. The scale bar is  $5 \mu\text{m}$ .

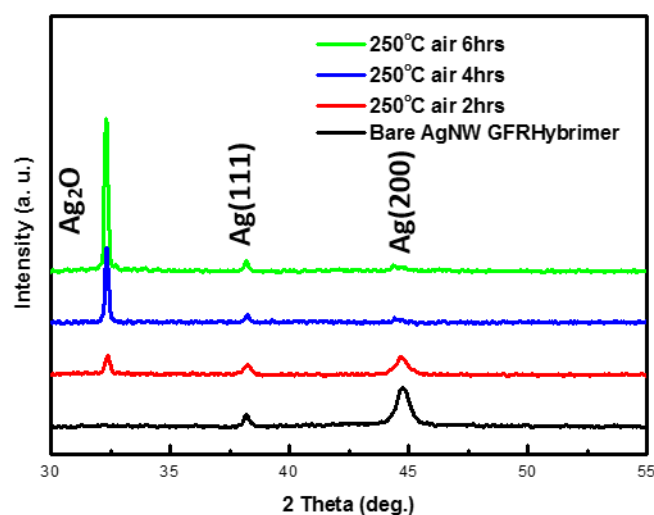

#### Time-dependent thermal oxidation behavior of AgNW-GFRHybrimer at 250 °C/air condition (250A)

**Figure S4.** XRD patterns of AgNW-GFRHybrimer film during 250 °C/air annealing. The peaks at  $2\theta = 44^\circ$ ,  $2\theta = 38^\circ$ , and  $2\theta = 32.4^\circ$  are assigned to Ag (200), Ag (111), and  $\text{Ag}_2\text{O}$ , respectively. As the annealing time increases, peaks of Ag(200) and Ag(111) gradually decreased.  $\text{Ag}_2\text{O}$  peak formed after 2 hours annealing become larger and larger as annealing time increased.
